# Supplementary material
Source: PubMed Central journal article supplement (PMC8361213)
Supplement: mmc1.pdf [file mmc1.pdf]

**Supplemental information**

**Acute SARS-CoV-2 infection is associated with  
an increased abundance of bacterial pathogens,  
including *Pseudomonas aeruginosa* in the nose**

**Nicholas S. Rhoades, Amanda N. Pinski, Alisha N. Monsibais, Allen Jankeel, Brianna M. Doratt, Isaac R. Cinco, Izabela Ibraim, and Ilhem Messaoudi**

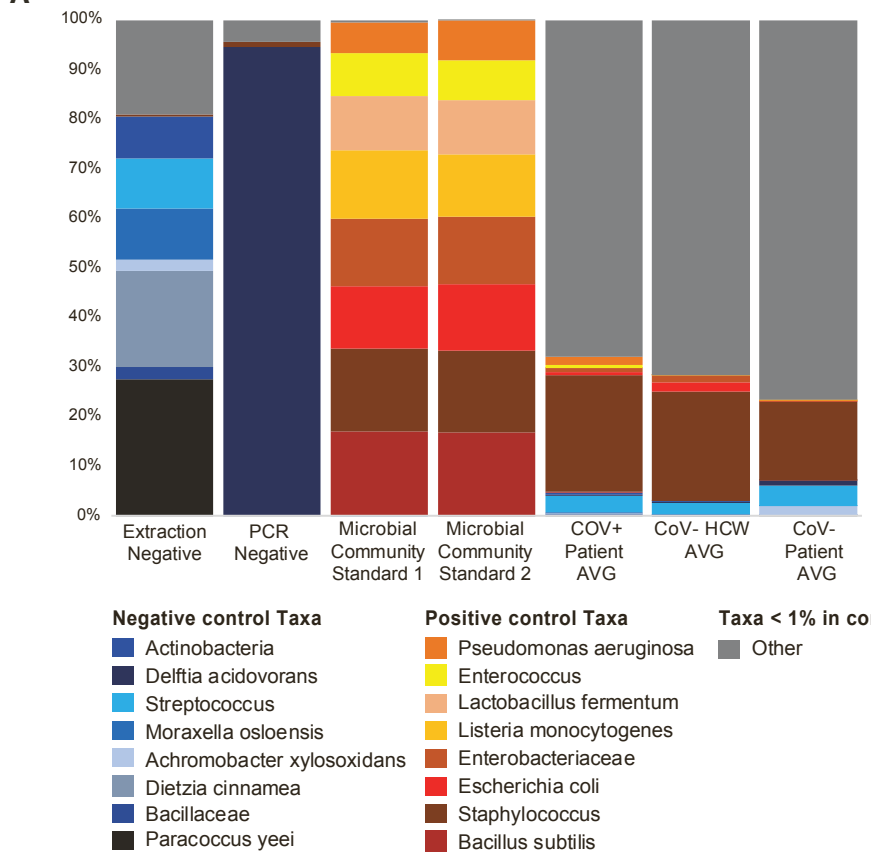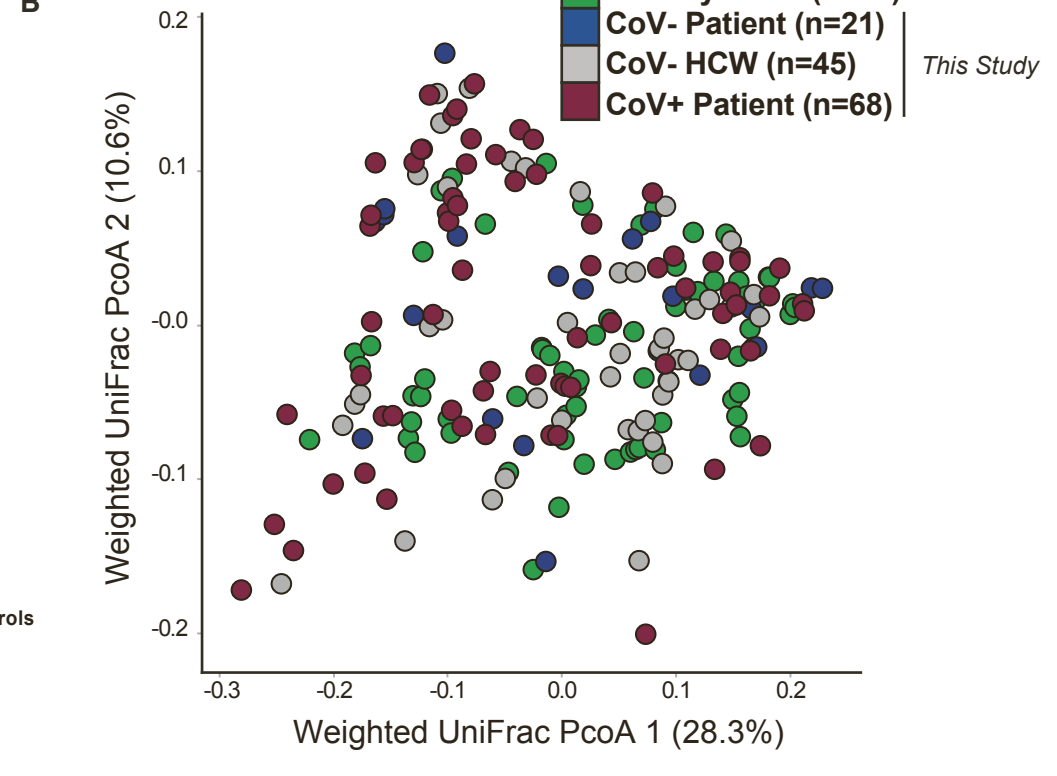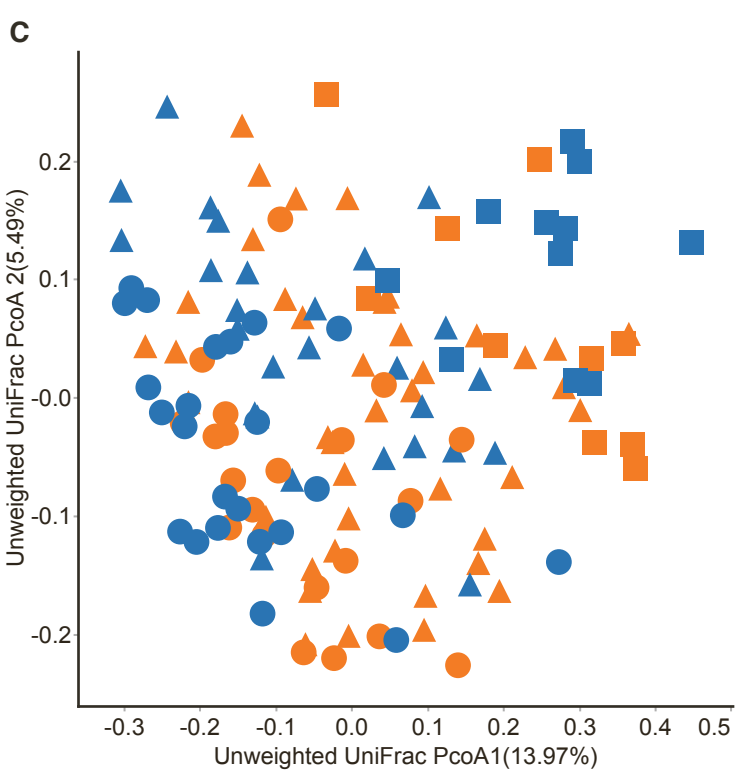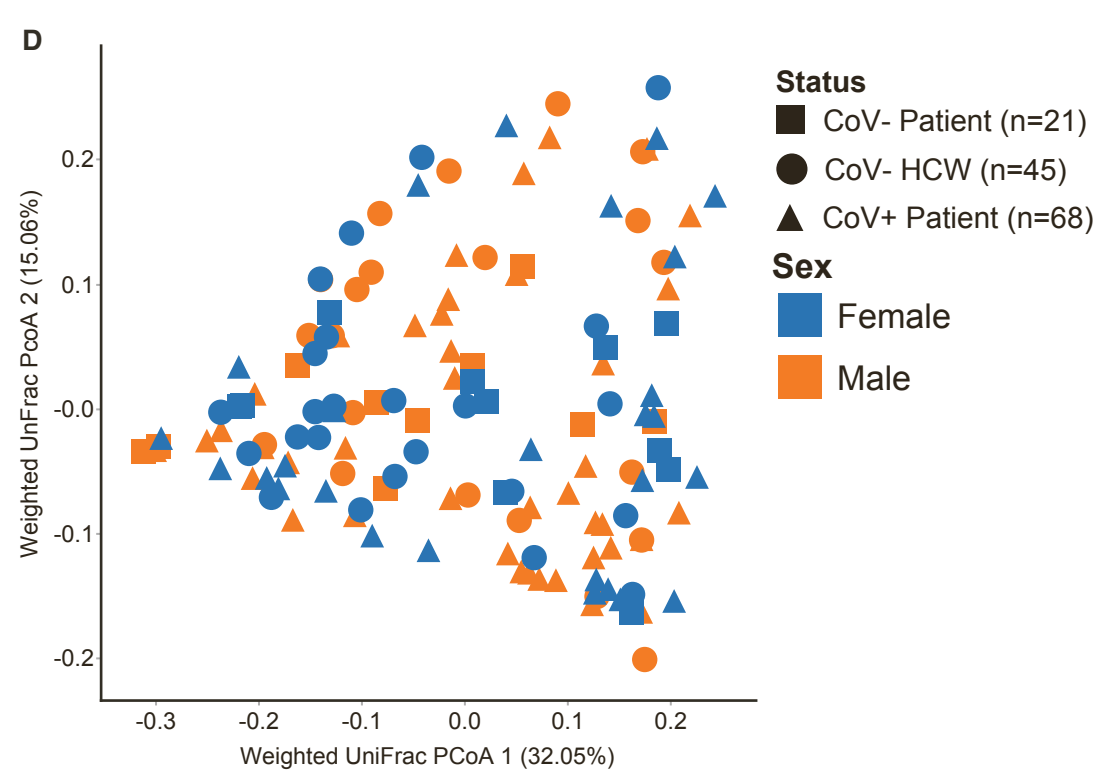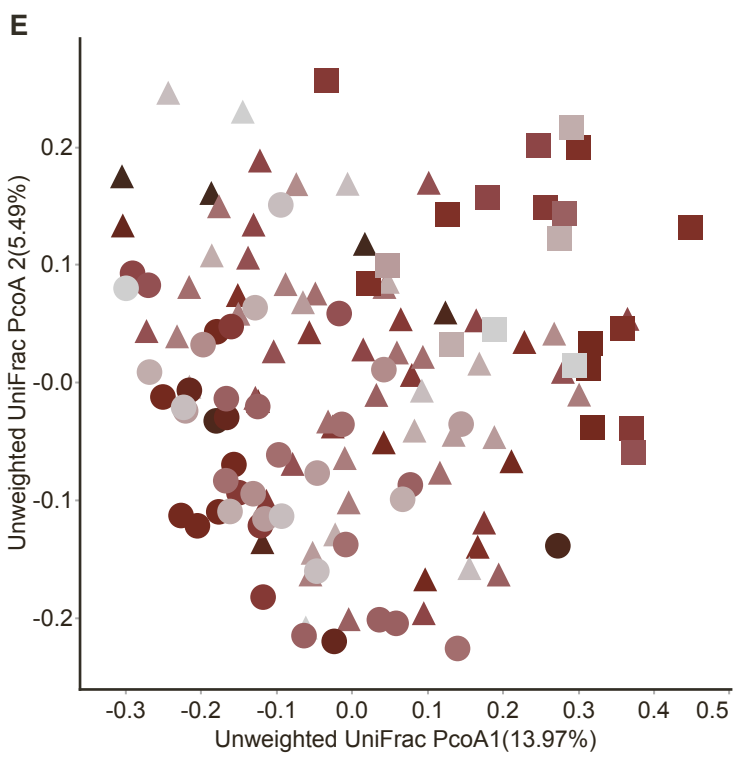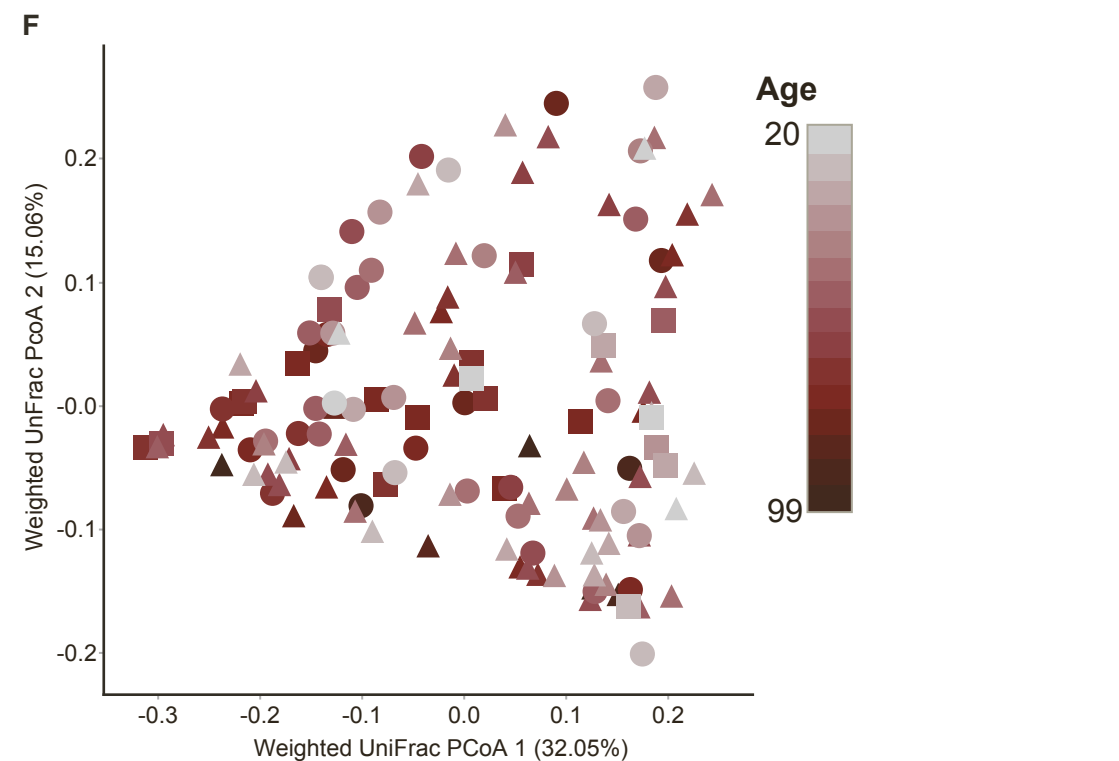

**G**

| Unweighted UniFrac PERMANOVA | R <sup>2</sup> | p            |
|------------------------------|----------------|--------------|
| Status                       | <b>0.093</b>   | <b>0.001</b> |
| Sex                          | <b>0.012</b>   | <b>0.015</b> |
| Age                          | 0.007          | 0.404        |
| Sex within Status            | 0.014          | 0.279        |
| Age within Status            | 0.012          | 0.78         |

**H**

| Weighted UniFrac PERMANOVA | R <sup>2</sup> | p            |
|----------------------------|----------------|--------------|
| Status                     | <b>0.04</b>    | <b>0.003</b> |
| Sex                        | 0.006          | 0.506        |
| Age                        | <b>0.016</b>   | <b>0.033</b> |
| Sex within Status          | 0.014          | 0.428        |
| Age within Status          | 0.016          | 0.318        |

**Supplemental Fig. 1: DNA co-eluted following RNA extraction from viral transport medium is reflective of a nasal microbiome identified using conventional DNA extraction methods.** Related to Figure 1. (A) Stacked bar plot highlighting taxa found in positive and negative control samples after removal of potential contaminating sequences, overlap of streptococcus between the extraction control and patient samples was not shared at the ASV level. (B) Principal-coordinate analysis of nasal microbiome weighted UniFrac distance including samples from this study and previously published “healthy” nasal microbiome data. (C-F) Principal-coordinate analysis of nasal microbiome unweighted (C,E) and weighted (D,F) distance including data only from this study colored by sex (C,D) and age (E,F). (G,H) The contribution of age, sex, age within status and sex within status to the total variance in the unweighted (G) and unweighted (H) UniFrac distance measured using PERMANOVA (Adonis with 999 permutations).

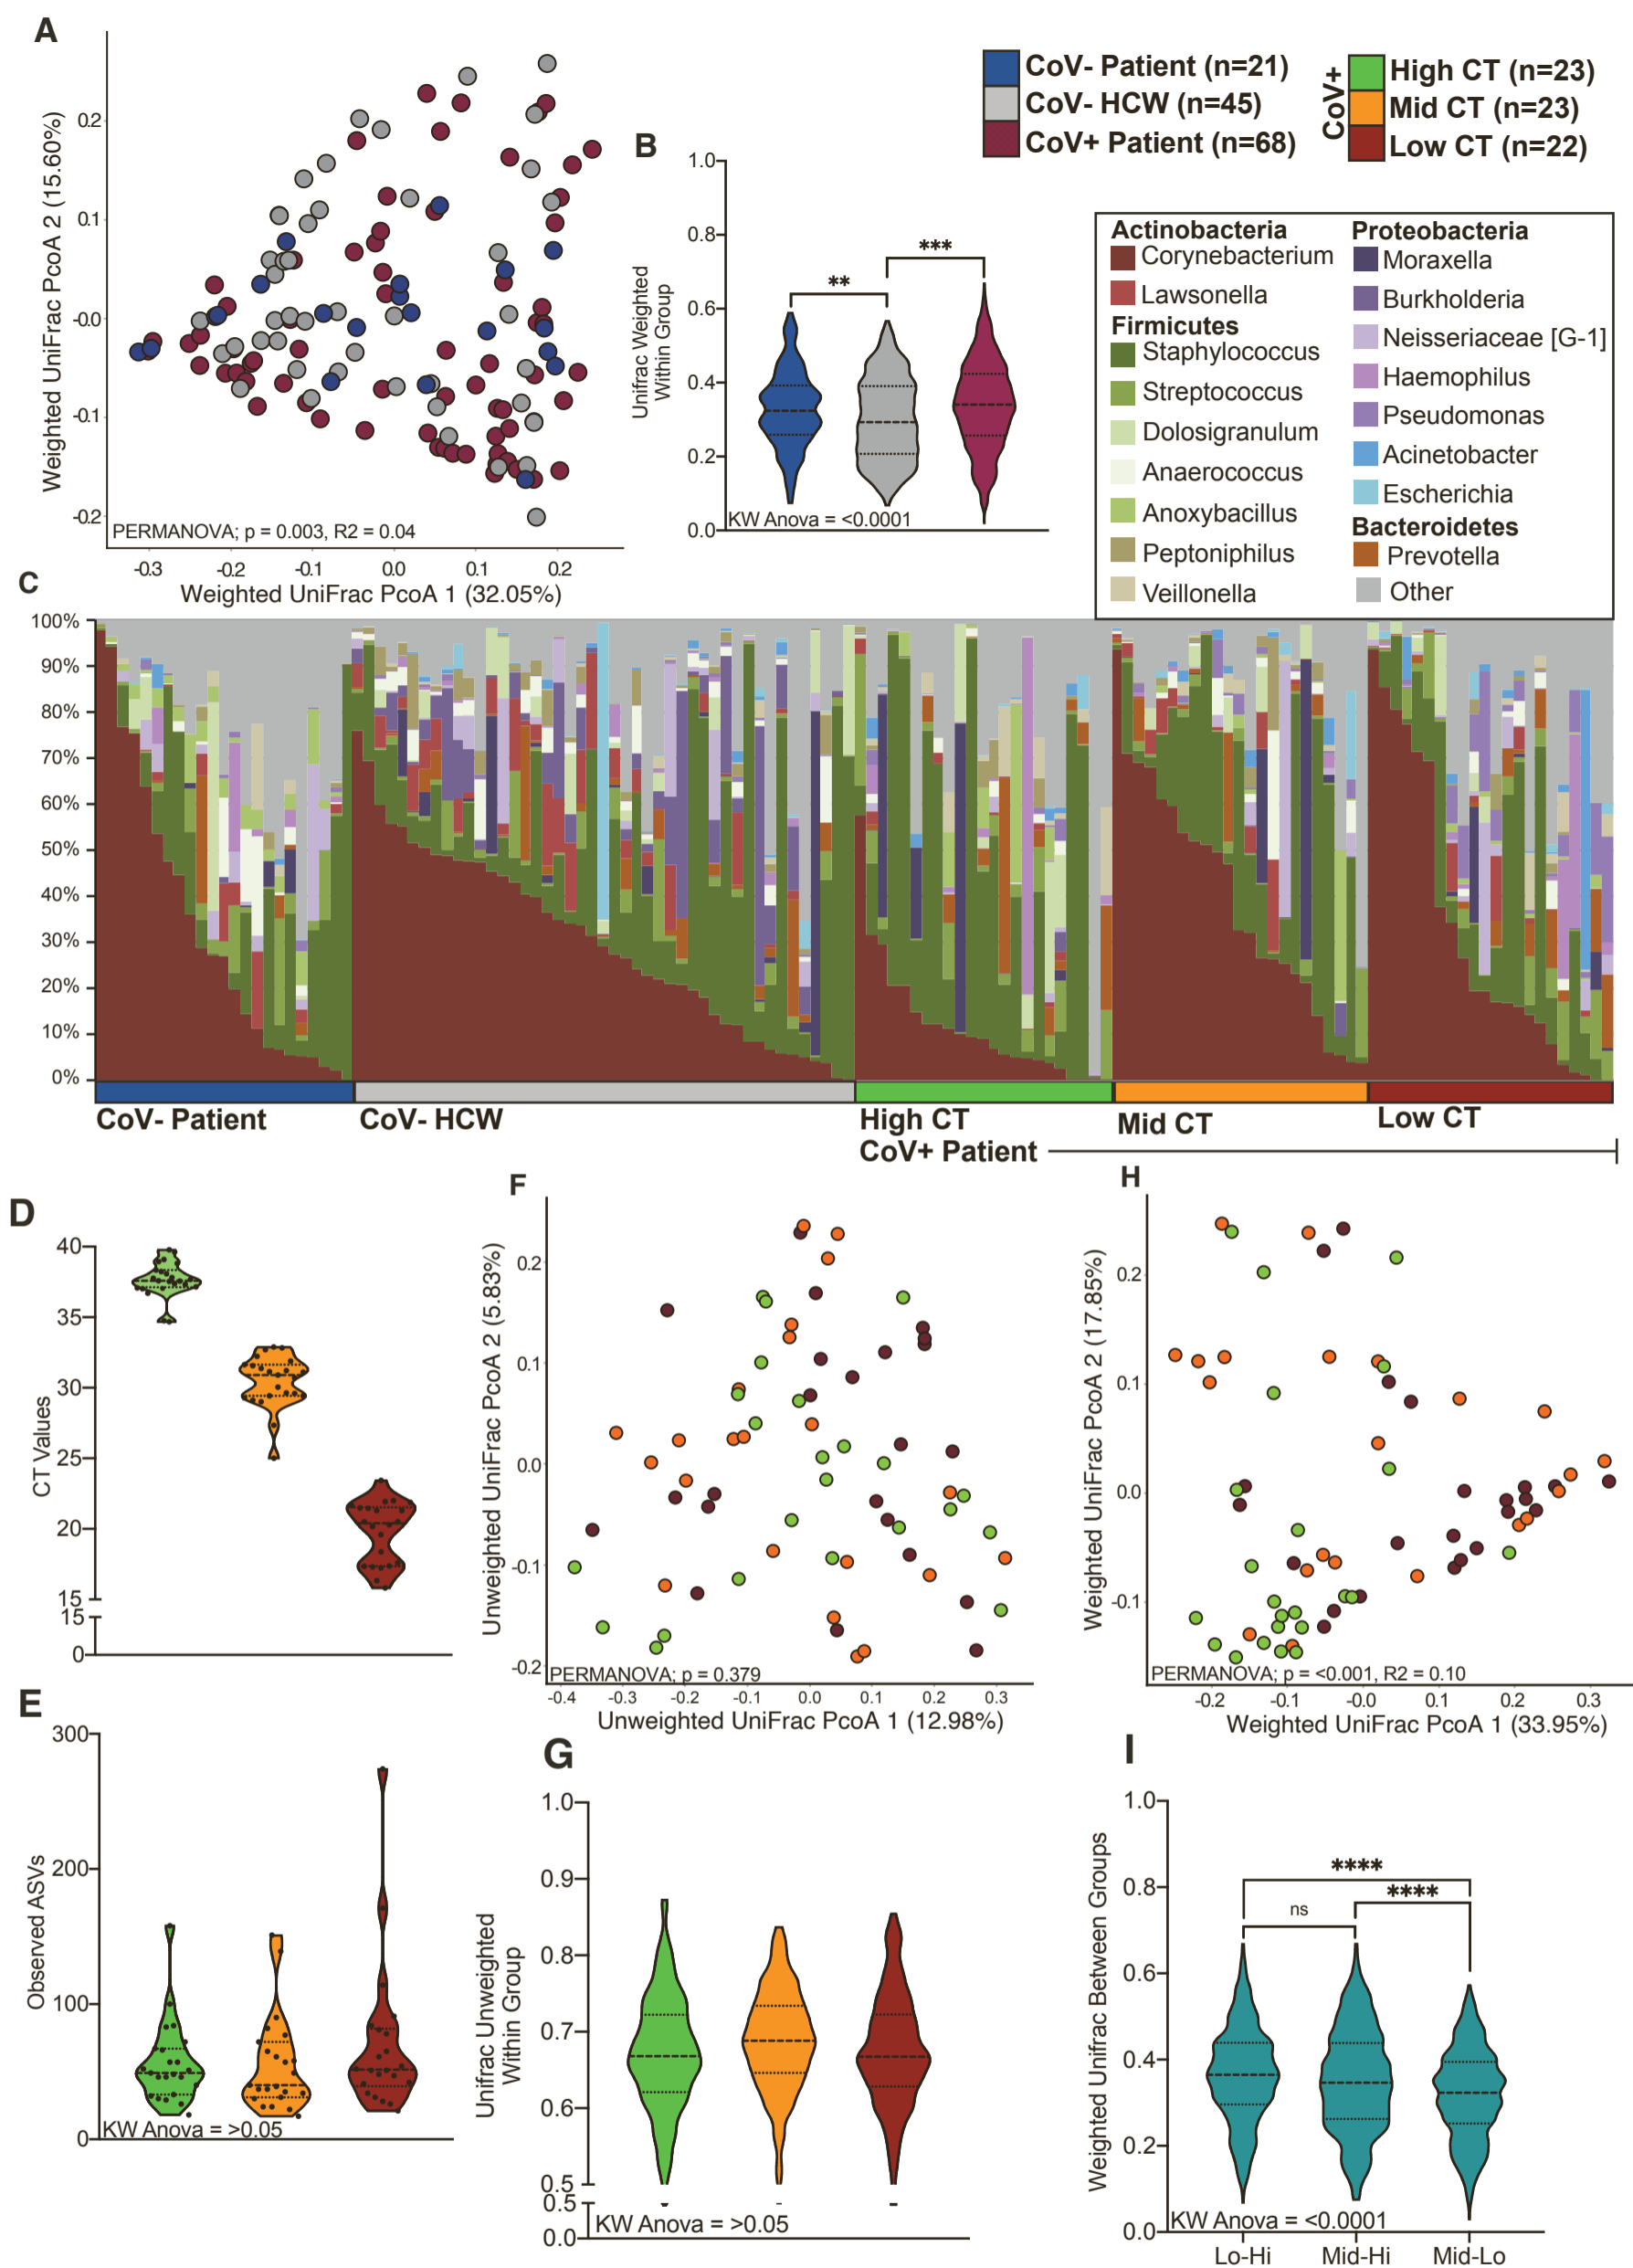

**Supplemental Fig. 2: Additional features of the nasal microbiome associated with SARS-CoV-2 infection.** Related to Figure 2. (A) Principal-coordinate analysis of nasal microbiome weighted UniFrac distance colored by host status. The contribution of host status to the total variance in the weighted UniFrac dissimilarity matrices was measured using PERMANOVA (Adonis with 10,000 permutations). (B) Violin plot illustrating average weighted UniFrac distances within each group. (C) Stacked bar of bacterial genera found at greater than 1% average abundance across the entire study population. Each vertical bar represents an individual sample and are ordered horizontally by host status. (D) Violin plot of Ct values generated via reverse transcription quantitative PCR of the SARS-CoV-2 Spike gene showing the distribution of samples within each CT group. (E) Violin plot of observed amplicon sequencing variants split by host Ct group within CoV+ patients. (F) Principal-coordinate analysis of nasal microbiome unweighted UniFrac distance colored by Ct group. The contribution of Ct value to the total variance in the weighted UniFrac dissimilarity matrices was measured using PERMANOVA (Adonis with 10,000 permutations). (G) Violin plot illustrating average unweighted UniFrac distances within each group. (H) Principal-coordinate analysis of nasal microbiome weighted UniFrac distance colored by Ct group. The contribution of the Ct to the total variance in the weighted UniFrac dissimilarity matrices was measured using PERMANOVA (Adonis with 10,000 permutations). (I) Violin plot illustrating average weighted UniFrac distances between each CT group. Significance for panels B,E,G,I was determined using Kruskal Wallis non-parametric ANOVA, with Dunn's multiple comparison \* =  $p < 0.05$ , \*\* =  $p < 0.01$ , \*\*\* =  $p < 0.001$ , \*\*\*\* =  $p < 0.0001$ .

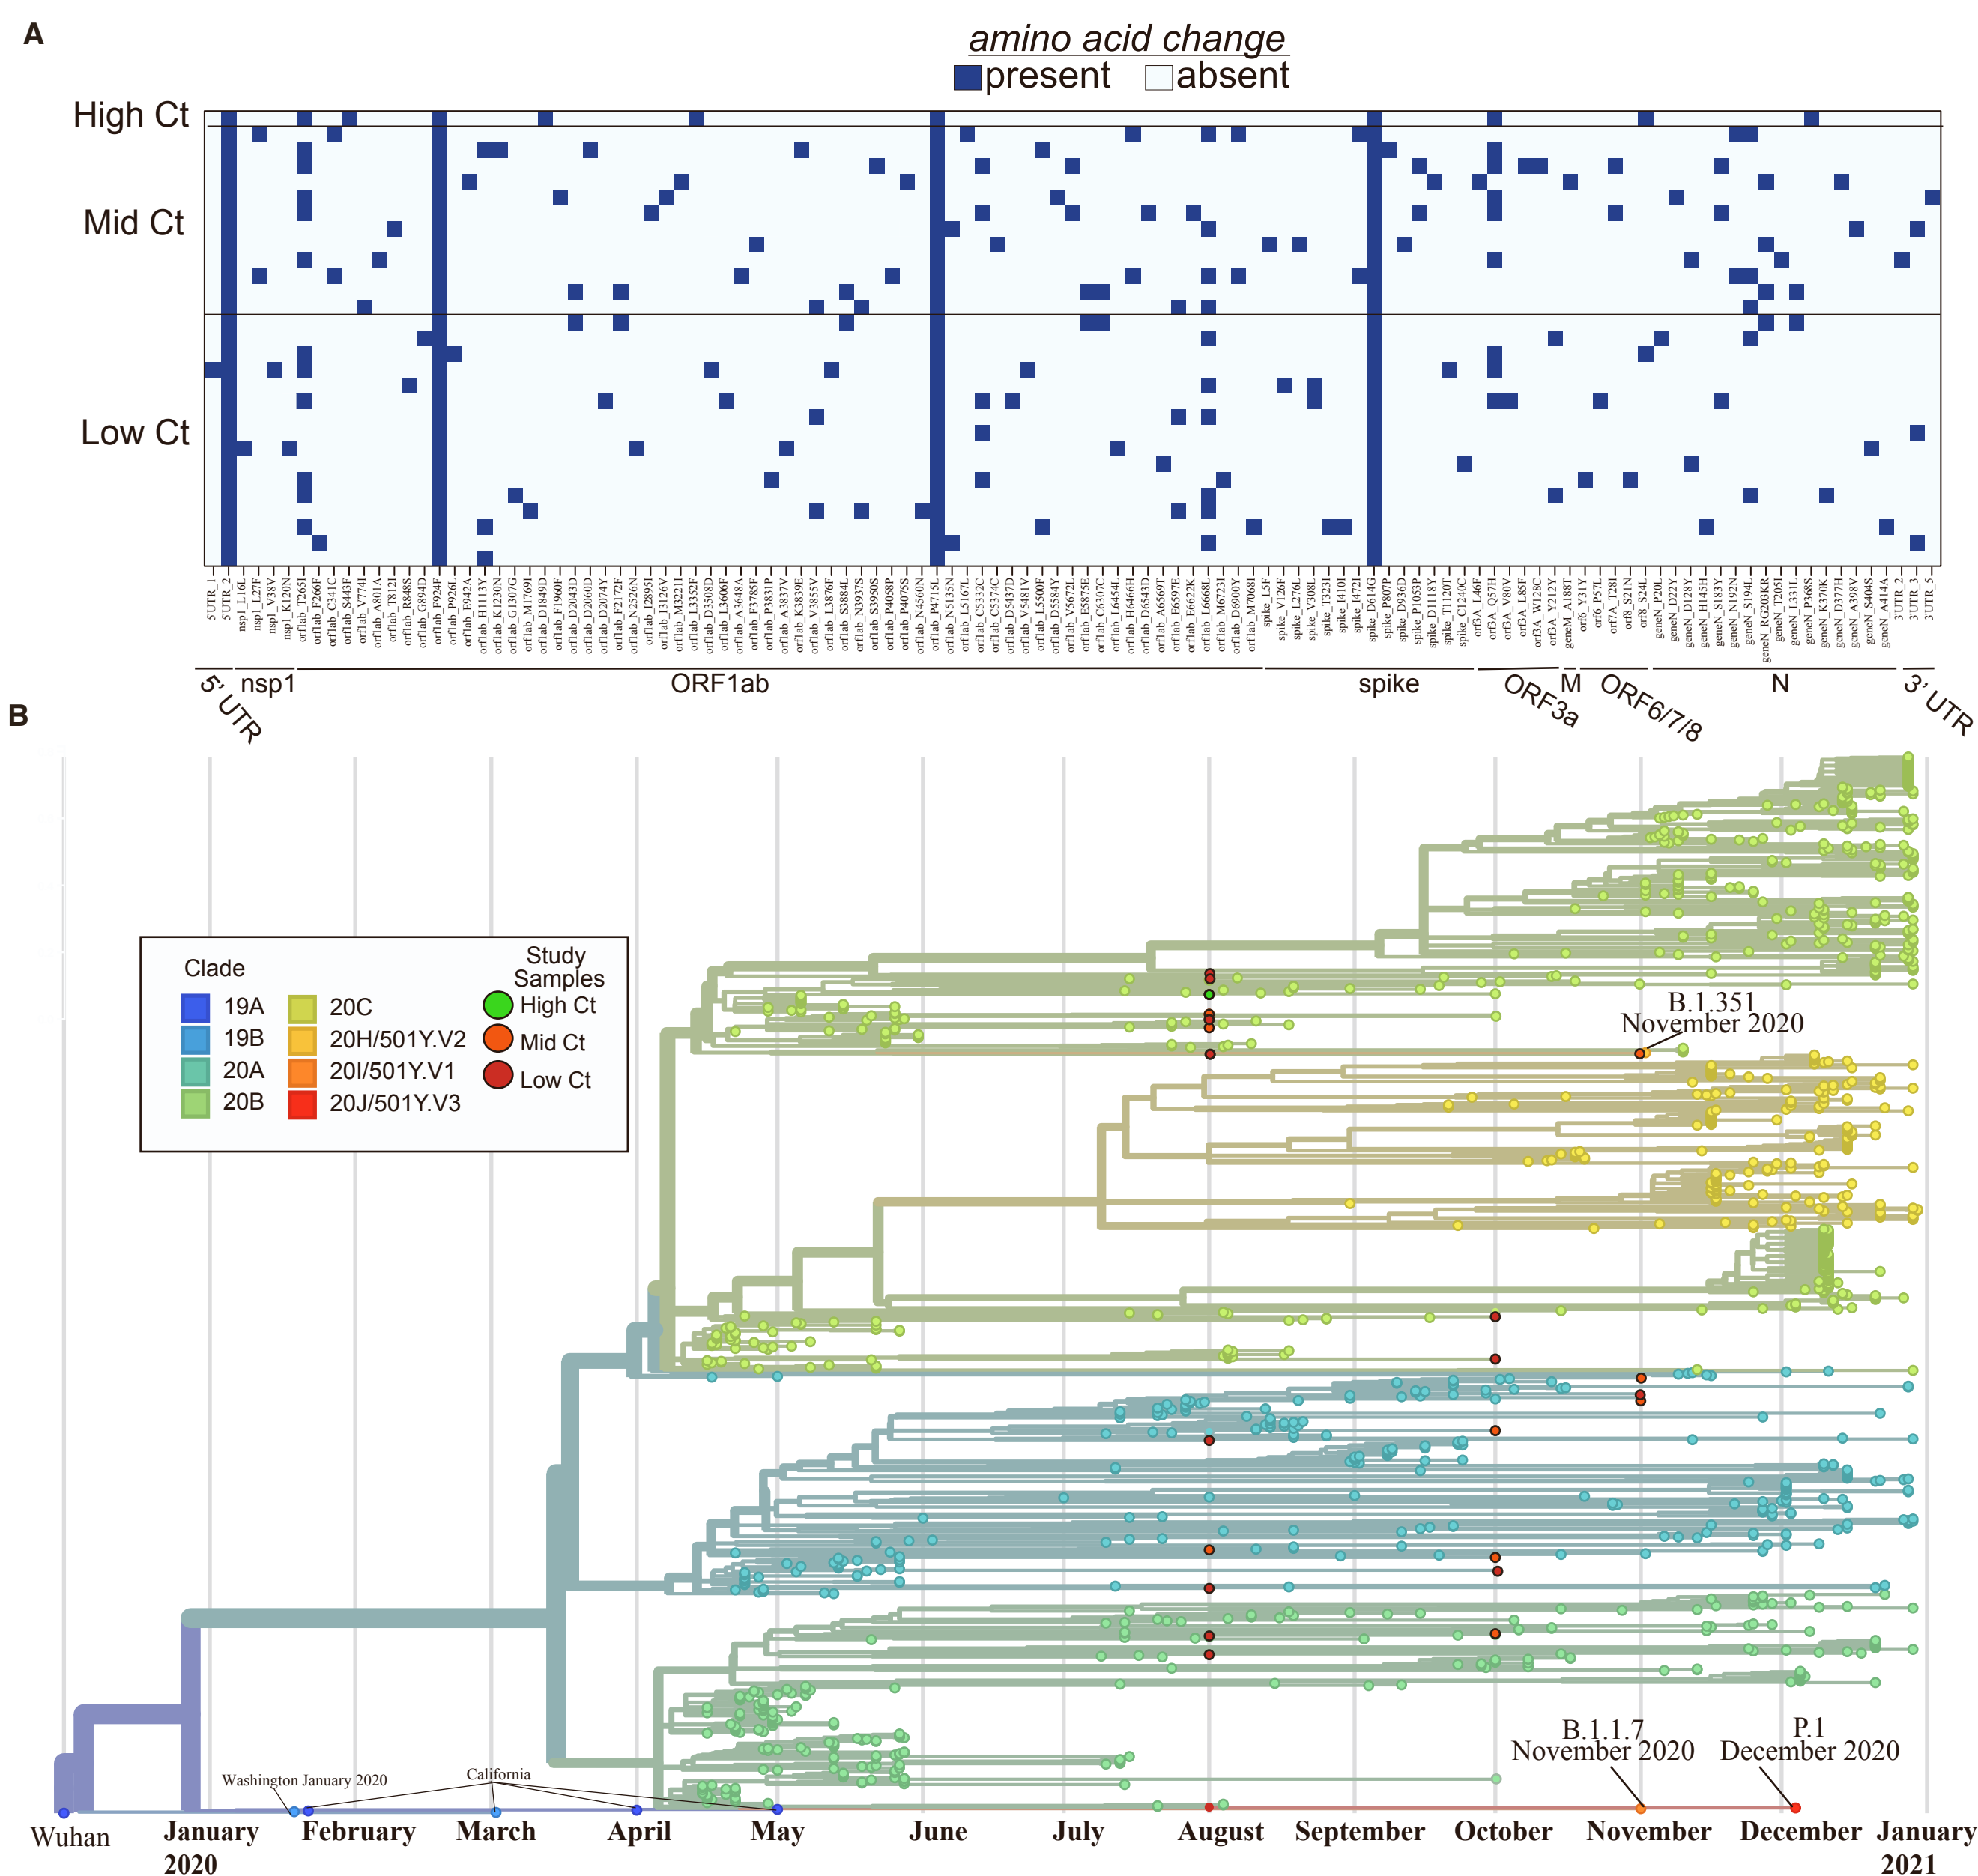

**Supplemental Fig. 3: Viral genome assembly and genetic variation.** Related to Figure 3. (A) Genome coverage (%) for each Ct group. (B) Amino acids mutations occurring in genomes with coverage > 90%. Each row represents an individual subject. Horizontal axis is order 3' to 5'. (B) Nextstrain phylogenetic tree of genomes with >90% coverage, variants of concern (P.1, B.1.1.7, B.1.351, B.1.427, B.1.429) and all genomes collected from Orange County, California January 2020 to December 2020.

**Supplemental Table 1: Sample Metadata, Related to Figure 1. NA = Not Applicable.**

| SampleID | Status   | CT_Value  | CT_CAT | Age | Sex | Viral Genome          | RNAseq | Microbiome |
|----------|----------|-----------|--------|-----|-----|-----------------------|--------|------------|
| HCW_1    | CoV- HCW | NA        | NA     | 78  | F   | NA                    | No     | Yes        |
| HCW_2    | CoV- HCW | NA        | NA     | 55  | F   | NA                    | No     | Yes        |
| HCW_3    | CoV- HCW | NA        | NA     | 77  | F   | NA                    | No     | Yes        |
| HCW_4    | CoV- HCW | NA        | NA     | 76  | F   | NA                    | No     | Yes        |
| HCW_5    | CoV- HCW | NA        | NA     | 82  | M   | NA                    | No     | Yes        |
| HCW_6    | CoV- HCW | NA        | NA     | 55  | M   | NA                    | No     | Yes        |
| HCW_7    | CoV- HCW | NA        | NA     | 37  | M   | NA                    | No     | Yes        |
| HCW_8    | CoV- HCW | NA        | NA     | 55  | M   | NA                    | No     | Yes        |
| HCW_9    | CoV- HCW | NA        | NA     | 29  | M   | NA                    | No     | Yes        |
| HCW_10   | CoV- HCW | NA        | NA     | 80  | M   | NA                    | Yes    | Yes        |
| HCW_11   | CoV- HCW | NA        | NA     | 76  | F   | NA                    | No     | Yes        |
| HCW_12   | CoV- HCW | NA        | NA     | 83  | M   | NA                    | No     | Yes        |
| HCW_13   | CoV- HCW | NA        | NA     | 71  | F   | NA                    | No     | Yes        |
| HCW_14   | CoV- HCW | NA        | NA     | 91  | M   | NA                    | No     | Yes        |
| HCW_15   | CoV- HCW | NA        | NA     | 55  | M   | NA                    | No     | Yes        |
| HCW_16   | CoV- HCW | NA        | NA     | 48  | M   | NA                    | No     | Yes        |
| HCW_17   | CoV- HCW | NA        | NA     | 76  | F   | NA                    | No     | Yes        |
| HCW_18   | CoV- HCW | NA        | NA     | 28  | M   | NA                    | No     | Yes        |
| HCW_19   | CoV- HCW | NA        | NA     | 68  | F   | NA                    | No     | Yes        |
| HCW_20   | CoV- HCW | NA        | NA     | 53  | F   | NA                    | No     | Yes        |
| HCW_21   | CoV- HCW | NA        | NA     | 55  | M   | NA                    | No     | Yes        |
| HCW_22   | CoV- HCW | NA        | NA     | 50  | M   | NA                    | No     | Yes        |
| HCW_23   | CoV- HCW | NA        | NA     | 49  | F   | NA                    | No     | Yes        |
| HCW_24   | CoV- HCW | NA        | NA     | 91  | F   | NA                    | No     | Yes        |
| HCW_25   | CoV- HCW | NA        | NA     | 39  | M   | NA                    | No     | Yes        |
| HCW_26   | CoV- HCW | NA        | NA     | 66  | F   | NA                    | No     | Yes        |
| HCW_27   | CoV- HCW | NA        | NA     | 24  | F   | NA                    | No     | Yes        |
| HCW_28   | CoV- HCW | NA        | NA     | 36  | M   | NA                    | No     | Yes        |
| HCW_29   | CoV- HCW | NA        | NA     | 32  | M   | NA                    | No     | Yes        |
| HCW_30   | CoV- HCW | NA        | NA     | 30  | F   | NA                    | No     | Yes        |
| HCW_31   | CoV- HCW | NA        | NA     | 48  | M   | NA                    | No     | Yes        |
| HCW_32   | CoV- HCW | NA        | NA     | 30  | F   | NA                    | No     | Yes        |
| HCW_33   | CoV- HCW | NA        | NA     | 37  | F   | NA                    | No     | Yes        |
| HCW_34   | CoV- HCW | NA        | NA     | 29  | M   | NA                    | No     | Yes        |
| HCW_35   | CoV- HCW | NA        | NA     | 61  | F   | NA                    | No     | Yes        |
| HCW_36   | CoV- HCW | NA        | NA     | 33  | F   | NA                    | No     | Yes        |
| HCW_37   | CoV- HCW | NA        | NA     | 26  | F   | NA                    | No     | Yes        |
| HCW_38   | CoV- HCW | NA        | NA     | 35  | F   | NA                    | Yes    | Yes        |
| HCW_39   | CoV- HCW | NA        | NA     | 43  | M   | NA                    | No     | Yes        |
| HCW_40   | CoV- HCW | NA        | NA     | 50  | M   | NA                    | Yes    | Yes        |
| HCW_41   | CoV- HCW | NA        | NA     | 68  | F   | NA                    | No     | Yes        |
| HCW_42   | CoV- HCW | NA        | NA     | 82  | F   | NA                    | No     | Yes        |
| HCW_43   | CoV- HCW | NA        | NA     | 61  | F   | NA                    | No     | Yes        |
| HCW_44   | CoV- HCW | NA        | NA     | 42  | M   | NA                    | Yes    | Yes        |
| HCW_45   | CoV- HCW | NA        | NA     | 67  | F   | NA                    | No     | Yes        |
| COV_2    | CoV+     | 38.076218 | Hi     | 99  | F   | < 90% genome coverage | No     | Yes        |
| COV_3    | CoV+     | 36.700247 | Hi     | 55  | M   | < 90% genome coverage | No     | Yes        |
| COV_8    | CoV+     | 37.806442 | Hi     | 51  | M   | < 90% genome coverage | No     | Yes        |
| COV_10   | CoV+     | 37.121967 | Hi     | 26  | F   | No Library generated  | No     | Yes        |
| COV_16   | CoV+     | 39.08479  | Hi     | 32  | F   | < 90% genome coverage | No     | Yes        |
| COV_17   | CoV+     | 37.37857  | Hi     | 67  | F   | < 90% genome coverage | No     | Yes        |
| COV_19   | CoV+     | 37.56185  | Hi     | 59  | F   | < 90% genome coverage | No     | Yes        |
| COV_24   | CoV+     | 37.584984 | Hi     | 79  | M   | < 90% genome coverage | No     | Yes        |
| COV_42   | CoV+     | 37.14862  | Hi     | 69  | M   | Yes                   | No     | Yes        |
| COV_48   | CoV+     | 37.538563 | Hi     | 34  | M   | < 90% genome coverage | No     | Yes        |
| COV_49   | CoV+     | 38.944378 | Hi     | 70  | M   | < 90% genome coverage | No     | Yes        |

|          |              |           |     |    |   |                       |     |     |
|----------|--------------|-----------|-----|----|---|-----------------------|-----|-----|
| COV_50   | CoV+         | 38.812202 | Hi  | 30 | M | < 90% genome coverage | No  | Yes |
| COV_51   | CoV+         | 37.67764  | Hi  | 62 | M | < 90% genome coverage | No  | Yes |
| COV_53   | CoV+         | 39.622738 | Hi  | 91 | F | < 90% genome coverage | No  | Yes |
| COV_54   | CoV+         | 38.347515 | Hi  | 40 | M | < 90% genome coverage | No  | Yes |
| COV_55   | CoV+         | 37.016968 | Hi  | 25 | M | No Library generated  | No  | Yes |
| COV_56   | CoV+         | 38.229053 | Hi  | 77 | M | No Library generated  | No  | Yes |
| COV_57   | CoV+         | 37.764614 | Hi  | 62 | M | No Library generated  | No  | Yes |
| COV_59   | CoV+         | 39.776764 | Hi  | 24 | M | < 90% genome coverage | No  | Yes |
| COV_61   | CoV+         | 37.07317  | Hi  | 45 | M | No Library generated  | No  | Yes |
| COV_62   | CoV+         | 37.32942  | Hi  | 59 | F | < 90% genome coverage | No  | Yes |
| COV_63   | CoV+         | 34.675777 | Hi  | 49 | F | < 90% genome coverage | No  | Yes |
| COV_67   | CoV+         | 34.74406  | Hi  | 45 | F | < 90% genome coverage | No  | Yes |
| COV_1    | CoV+         | 20.173272 | Low | 61 | F | Yes                   | No  | Yes |
| COV_5    | CoV+         | 20.293746 | Low | 24 | M | Yes                   | No  | Yes |
| COV_18   | CoV+         | 22.005283 | Low | 59 | F | < 90% genome coverage | No  | Yes |
| COV_21   | CoV+         | 17.307197 | Low | 98 | F | Yes                   | No  | Yes |
| COV_23   | CoV+         | 20.507776 | Low | 58 | M | Yes                   | No  | Yes |
| COV_25   | CoV+         | 21.307083 | Low | 71 | M | Yes                   | No  | Yes |
| COV_26   | CoV+         | 21.88542  | Low | 44 | M | Yes                   | No  | Yes |
| COV_27   | CoV+         | 21.656952 | Low | 49 | F | Yes                   | No  | Yes |
| COV_28   | CoV+         | 15.81649  | Low | 59 | M | < 90% genome coverage | Yes | Yes |
| COV_30   | CoV+         | 17.344656 | Low | 56 | M | Yes                   | Yes | Yes |
| COV_33   | CoV+         | 21.483639 | Low | 47 | M | Yes                   | No  | Yes |
| COV_34   | CoV+         | 21.459263 | Low | 87 | F | Yes                   | No  | Yes |
| COV_35   | CoV+         | 17.365662 | Low | 34 | F | Yes                   | No  | Yes |
| COV_39   | CoV+         | 20.509508 | Low | 46 | M | Yes                   | No  | Yes |
| COV_40   | CoV+         | 18.368208 | Low | 32 | F | < 90% genome coverage | No  | Yes |
| COV_41   | CoV+         | 23.435507 | Low | 60 | F | Yes                   | No  | Yes |
| COV_43   | CoV+         | 17.242144 | Low | 62 | M | Yes                   | Yes | Yes |
| COV_44   | CoV+         | 16.328108 | Low | 49 | F | Yes                   | No  | Yes |
| COV_46   | CoV+         | 19.594623 | Low | 95 | F | Yes                   | No  | Yes |
| COV_64   | CoV+         | 21.307083 | Low | 71 | M | No Library generated  | No  | Yes |
| COV_66   | CoV+         | 17.60019  | Low | 47 | M | < 90% genome coverage | No  | Yes |
| COV_68   | CoV+         | 21.933756 | Low | 76 | F | < 90% genome coverage | No  | Yes |
| COV_4    | CoV+         | 31.215872 | Mid | 30 | M | < 90% genome coverage | No  | Yes |
| COV_6    | CoV+         | 29.00934  | Mid | 83 | F | Yes                   | No  | Yes |
| COV_7    | CoV+         | 29.424534 | Mid | 51 | M | Yes                   | No  | Yes |
| COV_9    | CoV+         | 29.59582  | Mid | 26 | F | Yes                   | No  | Yes |
| COV_11   | CoV+         | 31.63975  | Mid | 33 | F | < 90% genome coverage | No  | Yes |
| COV_12   | CoV+         | 31.136995 | Mid | 28 | F | Yes                   | No  | Yes |
| COV_13   | CoV+         | 31.890806 | Mid | 65 | M | No Library generated  | No  | Yes |
| COV_14   | CoV+         | 30.049786 | Mid | 75 | F | < 90% genome coverage | No  | Yes |
| COV_15   | CoV+         | 32.22774  | Mid | 52 | M | < 90% genome coverage | No  | Yes |
| COV_20   | CoV+         | 30.898294 | Mid | 46 | M | Yes                   | Yes | Yes |
| COV_22   | CoV+         | 32.890465 | Mid | 51 | M | < 90% genome coverage | No  | Yes |
| COV_29   | CoV+         | 25.006283 | Mid | 38 | M | Yes                   | No  | Yes |
| COV_31   | CoV+         | 29.639048 | Mid | 70 | M | Yes                   | No  | Yes |
| COV_32   | CoV+         | 32.694588 | Mid | 66 | M | < 90% genome coverage | No  | Yes |
| COV_36   | CoV+         | 29.281885 | Mid | 56 | M | Yes                   | No  | Yes |
| COV_37   | CoV+         | 31.368456 | Mid | 73 | M | Yes                   | No  | Yes |
| COV_38   | CoV+         | 32.829716 | Mid | 77 | F | < 90% genome coverage | No  | Yes |
| COV_45   | CoV+         | 31.100018 | Mid | 50 | M | < 90% genome coverage | No  | Yes |
| COV_47   | CoV+         | 30.700317 | Mid | 32 | M | < 90% genome coverage | No  | Yes |
| COV_52   | CoV+         | 29.120705 | Mid | 65 | M | Yes                   | No  | Yes |
| COV_58   | CoV+         | 31.564772 | Mid | 36 | F | Yes                   | No  | Yes |
| COV_60   | CoV+         | 29.432646 | Mid | 75 | M | Yes                   | No  | Yes |
| COV_65   | CoV+         | 27.339397 | Mid | 40 | M | < 90% genome coverage | No  | Yes |
| NonCoV_1 | CoV- patient | NA        | NA  | 32 | F | NA                    | No  | Yes |

|           |              |    |    |    |   |    |    |     |
|-----------|--------------|----|----|----|---|----|----|-----|
| NonCoV_2  | CoV- patient | NA | NA | 30 | F | NA | No | Yes |
| NonCoV_3  | CoV- patient | NA | NA | 75 | F | NA | No | Yes |
| NonCoV_4  | CoV- patient | NA | NA | 77 | M | NA | No | Yes |
| NonCoV_8  | CoV- patient | NA | NA | 73 | M | NA | No | Yes |
| NonCoV_9  | CoV- patient | NA | NA | 71 | M | NA | No | Yes |
| NonCoV_10 | CoV- patient | NA | NA | 77 | M | NA | No | Yes |
| NonCoV_12 | CoV- patient | NA | NA | 72 | F | NA | No | Yes |
| NonCoV_13 | CoV- patient | NA | NA | 20 | M | NA | No | Yes |
| NonCoV_14 | CoV- patient | NA | NA | 24 | F | NA | No | Yes |
| NonCoV_16 | CoV- patient | NA | NA | 33 | F | NA | No | Yes |
| NonCoV_17 | CoV- patient | NA | NA | 62 | F | NA | No | Yes |
| NonCoV_18 | CoV- patient | NA | NA | 72 | M | NA | No | Yes |
| NonCoV_19 | CoV- patient | NA | NA | 59 | M | NA | No | Yes |
| NonCoV_20 | CoV- patient | NA | NA | 36 | F | NA | No | Yes |
| NonCoV_22 | CoV- patient | NA | NA | 77 | F | NA | No | Yes |
| NonCoV_23 | CoV- patient | NA | NA | 70 | F | NA | No | Yes |
| NonCoV_24 | CoV- patient | NA | NA | 68 | M | NA | No | Yes |
| NonCoV_26 | CoV- patient | NA | NA | 65 | M | NA | No | Yes |
| NonCoV_27 | CoV- patient | NA | NA | 56 | F | NA | No | Yes |
| NonCoV_28 | CoV- patient | NA | NA | 73 | M | NA | No | Yes |

**Supplemental Table 2: Full LEFsE results, Related to Figure 2**

| Taxa                    | Group | Log10 LDA score | FDR p-value |
|-------------------------|-------|-----------------|-------------|
| g_Ochrobactrum          | CoV+  | 2.811758395     | 0.0367078   |
| g_Jeotgalicoccus        | CoV+  | 3.076247372     | 0.0078099   |
| g_Schaalia              | CoV+  | 3.483370495     | 0.0175861   |
| f_Bacillaceae           | CoV+  | 3.030009565     | 0.0343436   |
| g_Dermabacter           | CoV+  | 3.064796147     | 0.0036059   |
| g_Micrococcus           | CoV+  | 3.391801863     | 0.006672    |
| g_Fastidiosipila        | CoV+  | 3.070355684     | 0.0298342   |
| g_Paracoccus            | CoV+  | 2.916667243     | 0.0249822   |
| g_Peptoniphilaceae_G_3_ | CoV+  | 3.30527293      | 0.0098114   |
| g_Fusobacterium         | CoV+  | 3.289965814     | 0.002674    |
| g_Pseudomonas           | CoV+  | 4.001548907     | 0.0087463   |
| g_Prevotella            | CoV+  | 3.991703718     | 0.0225291   |
| g_Moraxella             | CoV+  | 4.211959633     | 0.0142522   |
| g_Acinetobacter         | CoV+  | 3.834024999     | 0.0110778   |
| f_Enterobacteriaceae    | CoV+  | 3.035617222     | 0.0010228   |
| g_Rothia                | CoV+  | 3.044886859     | 0.0019198   |
| g_Porphyrmonas          | CoV+  | 3.290269729     | 0.0162161   |
| g_Brevundimonas         | CoV+  | 2.825426652     | 0.0311487   |
| g_Peptoniphilus         | HCW   | 3.991241674     | 0.0002256   |
| g_Capnocytophaga        | HCW   | 2.997119911     | 0.0380345   |
| g_Mycobacterium         | HCW   | 3.362911231     | 0.0008491   |
| g_Cardiobacterium       | HCW   | 3.661581553     | 0.0243386   |
| g_Klebsiella            | HCW   | 3.744210715     | 0.0427925   |
| c_Gammaproteobacteria   | HCW   | 3.197456319     | 1.84E-09    |
| g_Acidovorax            | HCW   | 3.028770995     | 0.0241977   |
| g_Finegoldia            | HCW   | 3.515115664     | 0.0012149   |
| g_Lawsonella            | HCW   | 4.228442269     | 0.0001613   |
| g_Lactococcus           | HCW   | 3.675104466     | 0.0002873   |
| g_Sphingomonas          | HCW   | 3.437903649     | 0.0089651   |
| c_Alphaproteobacteria   | HCW   | 3.115002019     | 6.26E-06    |
| g_Turicella             | HCW   | 3.584602911     | 0.0003532   |
| g_Burkholderia          | HCW   | 4.546294251     | 7.17E-16    |
| g_Escherichia           | HCW   | 3.993386794     | 0.0196662   |
| g_Cutibacterium         | HCW   | 3.504843758     | 5.48E-15    |
| g_Kocuria               | HCW   | 3.143013983     | 0.0051622   |
| g_Delftia               | CoV-  | 3.692288734     | 0.0278583   |
| g_Paenibacillus         | CoV-  | 4.335964038     | 2.12E-19    |
| g_Brevibacterium        | CoV-  | 3.087982656     | 0.0394132   |
| g_Anaerococcus          | CoV-  | 3.995463034     | 0.0123125   |
| g_Anoxybacillus         | CoV-  | 4.223854276     | 9.19E-12    |
| c_Betaproteobacteria    | CoV-  | 4.065762597     | 8.34E-18    |
